# Supplementary material for: CNN_FunBar: Advanced Learning Technique for Fungi ITS Region Classification
Source: MDPI journal article supplement (doi:10.3390/genes14030634), 2023-03-03
Supplement: s1 [file s1]

**Table S2. Classification performances of CNN, SVM, KNN, Naïve-Bayes and Random Forest models for different k values at all taxonomic levels. Training datasets contain 100 datapoints (Class to Species) and 500 datapoints (Phylum) per category.**

| <b>Taxonomic Level<br/>(N = No. of categories)</b> | <b>Model</b> | <b><i>k</i></b> | <b>Avg. Accuracy (%)</b> | <b>Avg. Precision (%)</b> | <b>Avg. Recall (%)</b> | <b>Avg. F1 Score (%)</b> | <b>Avg. MCC Score (%)</b> |
|----------------------------------------------------|--------------|-----------------|--------------------------|---------------------------|------------------------|--------------------------|---------------------------|
| Species<br>(N = 429)                               | CNN          | 4               | 89.14                    | 89.78                     | 89.13                  | 89.01                    | 89.11                     |
|                                                    |              | 5               | 89.67                    | 90.28                     | 89.67                  | 89.56                    | 89.65                     |
|                                                    |              | 6               | 90                       | 90.58                     | 90                     | 89.82                    | 89.98                     |
|                                                    | SVM          | 4               | 85.8                     | 86.88                     | 85.8                   | 85.28                    | 85.78                     |
|                                                    |              | 5               | 87.35                    | 88.69                     | 87.35                  | 86.96                    | 87.33                     |
|                                                    |              | 6               | 88.02                    | 89.14                     | 88.03                  | 87.81                    | 88.01                     |
|                                                    | KNN          | 4               | 86.71                    | 87.54                     | 86.7                   | 86.48                    | 86.69                     |
|                                                    |              | 5               | 88.57                    | 89.1                      | 88.56                  | 88.17                    | 88.35                     |
|                                                    |              | 6               | 88.58                    | 89.11                     | 88.58                  | 88.21                    | 88.5                      |
|                                                    | Naïve-Bayes  | 4               | 74.68                    | 78.58                     | 74.68                  | 74.2                     | 74.66                     |
|                                                    |              | 5               | 75.17                    | 78.43                     | 75.18                  | 75.16                    | 75.17                     |
|                                                    |              | 6               | 76.01                    | 79.37                     | 76.01                  | 75.99                    | 76.01                     |
|                                                    | RF           | 4               | 89.12                    | 89.45                     | 89.12                  | 88.98                    | 89.1                      |
|                                                    |              | 5               | 89.34                    | 89.45                     | 89.34                  | 89.17                    | 89.31                     |
|                                                    |              | 6               | 89.68                    | 89.88                     | 89.67                  | 89.58                    | 89.65                     |
| Genus<br>(N = 1293)                                | CNN          | 4               | 94.78                    | 95.24                     | 94.77                  | 94.74                    | 94.78                     |
|                                                    |              | 5               | 95.37                    | 95.35                     | 95.36                  | 95.35                    | 95.33                     |
|                                                    |              | 6               | 95.39                    | 95.76                     | 95.39                  | 95.35                    | 95.39                     |
|                                                    | SVM          | 4               | 92.65                    | 93.62                     | 92.65                  | 92.81                    | 92.64                     |
|                                                    |              | 5               | 92.98                    | 93.49                     | 92.98                  | 92.78                    | 92.95                     |
|                                                    |              | 6               | 93.07                    | 94.56                     | 93.07                  | 93.52                    | 93.07                     |
|                                                    | KNN          | 4               | 93.1                     | 93.76                     | 93.1                   | 92.96                    | 93.08                     |
|                                                    |              | 5               | 93.52                    | 94.51                     | 93.53                  | 93.51                    | 93.52                     |
|                                                    |              | 6               | 93.64                    | 94.66                     | 93.64                  | 93.71                    | 93.63                     |
|                                                    | Naïve-Bayes  | 4               | 83.33                    | 87.78                     | 83.33                  | 84.19                    | 83.33                     |
|                                                    |              | 5               | 84                       | 84.12                     | 84.01                  | 83.89                    | 83.98                     |
|                                                    |              | 6               | 84.12                    | 85.2                      | 84.12                  | 84.11                    | 84.1                      |
|                                                    | RF           | 4               | 94.57                    | 94.89                     | 94.57                  | 94.48                    | 94.52                     |
|                                                    |              | 5               | 95.01                    | 95.29                     | 95.01                  | 94.99                    | 95                        |
|                                                    |              | 6               | 95.17                    | 95.58                     | 95.16                  | 95.36                    | 95.14                     |
| Family<br>(N = 453)                                | CNN          | 4               | 95.32                    | 95.9                      | 95.32                  | 95.32                    | 95.31                     |
|                                                    |              | 5               | 96.11                    | 96.54                     | 96.11                  | 96.08                    | 96.11                     |
|                                                    |              | 6               | 96.64                    | 96.94                     | 96.64                  | 96.63                    | 96.64                     |
|                                                    | SVM          | 4               | 94.13                    | 95.05                     | 94.14                  | 94.22                    | 94.13                     |
|                                                    |              | 5               | 95.22                    | 96.34                     | 95.21                  | 95.42                    | 95.21                     |
|                                                    |              | 6               | 95.31                    | 96.62                     | 95.31                  | 95.58                    | 95.53                     |

|                    |             |   |       |       |       |       |       |
|--------------------|-------------|---|-------|-------|-------|-------|-------|
|                    | KNN         | 4 | 93.07 | 93.85 | 93.06 | 92.98 | 93.05 |
|                    |             | 5 | 94.15 | 94.84 | 94.15 | 94.12 | 94.14 |
|                    |             | 6 | 93.71 | 94.82 | 93.72 | 93.13 | 93.71 |
|                    | Naïve-Bayes | 4 | 85.29 | 88.96 | 85.29 | 85.95 | 85.27 |
|                    |             | 5 | 85.79 | 87.64 | 85.78 | 85.69 | 85.77 |
|                    |             | 6 | 85.91 | 85.92 | 85.9  | 84.99 | 85.91 |
|                    | RF          | 4 | 94.56 | 94.91 | 94.56 | 94.48 | 94.55 |
|                    |             | 5 | 95.58 | 95.95 | 95.57 | 95.56 | 95.57 |
|                    |             | 6 | 96.64 | 96.94 | 96.64 | 96.59 | 96.64 |
| Order<br>(N = 149) | CNN         | 4 | 94.43 | 94.96 | 94.43 | 94.41 | 94.39 |
|                    |             | 5 | 95.64 | 96.16 | 95.64 | 95.61 | 95.61 |
|                    |             | 6 | 96.17 | 96.72 | 96.17 | 96.21 | 96.15 |
|                    | SVM         | 4 | 92.69 | 93.43 | 92.69 | 92.82 | 92.65 |
|                    |             | 5 | 94.02 | 94.87 | 94.01 | 94.19 | 93.98 |
|                    |             | 6 | 95.27 | 95.95 | 95.27 | 95.4  | 95.24 |
|                    | KNN         | 4 | 91.54 | 92.43 | 91.54 | 91.44 | 91.49 |
|                    |             | 5 | 93.69 | 94.57 | 93.69 | 93.64 | 93.65 |
|                    |             | 6 | 93.73 | 95.22 | 93.74 | 93.76 | 93.71 |
|                    | Naïve-Bayes | 4 | 85.4  | 85.64 | 85.41 | 85.39 | 85.4  |
|                    |             | 5 | 87    | 87.58 | 87.01 | 87.47 | 87.01 |
|                    |             | 6 | 88.54 | 88.89 | 88.54 | 88.35 | 88.52 |
|                    | RF          | 4 | 94.16 | 94.96 | 94.16 | 94.13 | 94.15 |
|                    |             | 5 | 95.63 | 95.14 | 95.63 | 95.59 | 95.6  |
|                    |             | 6 | 96.04 | 96.41 | 96.05 | 96.04 | 96.03 |
| Class<br>(N = 31)  | CNN         | 4 | 95.48 | 95.85 | 95.48 | 95.46 | 95.35 |
|                    |             | 5 | 97.42 | 97.64 | 97.42 | 97.39 | 97.34 |
|                    |             | 6 | 97.09 | 97.38 | 97.1  | 97.08 | 97.01 |
|                    | SVM         | 4 | 93.62 | 94.26 | 93.62 | 93.74 | 93.42 |
|                    |             | 5 | 95.19 | 95.75 | 95.19 | 95.32 | 95.05 |
|                    |             | 6 | 95.84 | 96.34 | 95.84 | 95.95 | 95.71 |
|                    | KNN         | 4 | 92.52 | 93.22 | 92.52 | 92.46 | 92.36 |
|                    |             | 5 | 93.44 | 94.15 | 93.54 | 93.39 | 93.36 |
|                    |             | 6 | 92.11 | 95.59 | 92.11 | 92.33 | 92.01 |
|                    | Naïve-Bayes | 4 | 88.38 | 89.76 | 88.38 | 88.57 | 88.04 |
|                    |             | 5 | 89.16 | 89.26 | 89.16 | 89.2  | 89.15 |
|                    |             | 6 | 89.29 | 89.43 | 89.28 | 89.19 | 89.25 |
|                    | RF          | 4 | 95.45 | 95.5  | 95.44 | 95.41 | 95.44 |
|                    |             | 5 | 97.06 | 97.26 | 97.06 | 97.05 | 97.01 |
|                    |             | 6 | 97.38 | 97.55 | 97.38 | 97.37 | 97.34 |
| Phylum<br>(N = 2)  | CNN         | 4 | 99    | 99.02 | 99    | 98.99 | 98.02 |
|                    |             | 5 | 100   | 100   | 100   | 100   | 100   |
|                    |             | 6 | 100   | 100   | 100   | 100   | 100   |
|                    | SVM         | 4 | 98.88 | 98.88 | 98.89 | 98.88 | 97.78 |

|  |             |   |       |       |       |       |       |
|--|-------------|---|-------|-------|-------|-------|-------|
|  |             | 5 | 99.55 | 99.56 | 99.55 | 99.55 | 99.1  |
|  |             | 6 | 99.55 | 99.56 | 99.55 | 99.55 | 99.11 |
|  | KNN         | 4 | 99    | 99.01 | 99    | 98.99 | 99.01 |
|  |             | 5 | 99.01 | 99.12 | 99.01 | 98.98 | 99.01 |
|  |             | 6 | 100   | 100   | 100   | 100   | 100   |
|  | Naïve-Bayes | 4 | 95    | 95.16 | 95    | 94.99 | 90.16 |
|  |             | 5 | 96    | 96.15 | 96    | 95.98 | 93.78 |
|  |             | 6 | 96.52 | 96.68 | 96.52 | 96.49 | 94.82 |
|  | RF          | 4 | 99    | 99.01 | 99    | 98.99 | 98.01 |
|  |             | 5 | 99    | 99.02 | 99    | 98.99 | 99.02 |
|  |             | 6 | 100   | 100   | 100   | 100   | 100   |
