# Supplementary material for: CNN_FunBar: Advanced Learning Technique for Fungi ITS Region Classification
Source: MDPI journal article supplement (doi:10.3390/genes14030634), 2023-03-03
Supplement: s1 [file s1]

**Table S1. Classification performances of CNN model with different  $k$  values for balanced datasets at all taxonomic levels. Values of performance metrics are obtained from corresponding test datasets**

| Taxonomic Level | $k$ | Total no. of categories | Seq per category | Avg. Accuracy (%) | Avg. Precision (%) | Avg. Recall (%) | Avg. F1 Score (%) | Avg. MCC Score (%) |
|-----------------|-----|-------------------------|------------------|-------------------|--------------------|-----------------|-------------------|--------------------|
| Species         | 4   | 2,752                   | 20               | 84.7              | 85.72              | 84.7            | 83.54             | 84.69              |
|                 |     | 939                     | 50               | 86.69             | 87.96              | 86.68           | 86.34             | 86.68              |
|                 |     | 429                     | 100              | 89.14             | 89.78              | 89.13           | 89.01             | 89.11              |
|                 |     | 148                     | 250              | 89.65             | 89.89              | 89.65           | 89.6              | 89.58              |
|                 |     | 117                     | 300              | 88.6              | 88.84              | 88.6            | 88.51             | 88.51              |
|                 |     | 64                      | 500              | 93.03             | 93.09              | 93.03           | 92.96             | 92.92              |
|                 | 5   | 2,752                   | 20               | 85.34             | 86.21              | 85.34           | 84.24             | 85.33              |
|                 |     | 939                     | 50               | 88.31             | 89.68              | 88.31           | 88.04             | 88.3               |
|                 |     | 429                     | 100              | 89.67             | 90.28              | 89.67           | 89.56             | 89.65              |
|                 |     | 148                     | 250              | 89.81             | 90.43              | 89.8            | 89.84             | 89.75              |
|                 |     | 117                     | 300              | 89.14             | 89.47              | 89.14           | 89.04             | 89.06              |
|                 |     | 64                      | 500              | 93.03             | 93.3               | 93.03           | 93.06             | 92.92              |
|                 | 6   | 2,752                   | 20               | 86.12             | 86.75              | 86.12           | 85.97             | 86.12              |
|                 |     | 939                     | 50               | 89.18             | 90.13              | 89.18           | 88.77             | 89.17              |
|                 |     | 429                     | 100              | 90                | 90.58              | 90              | 89.82             | 89.98              |
|                 |     | 148                     | 250              | 89.46             | 89.72              | 89.45           | 89.45             | 89.39              |
|                 |     | 117                     | 300              | 89.94             | 90.35              | 89.94           | 89.95             | 89.86              |
|                 |     | 64                      | 500              | 93.28             | 93.36              | 93.28           | 93.22             | 93.18              |
| Genus           | 4   | 1,682                   | 50               | 92.98             | 94.15              | 92.97           | 92.9              | 92.98              |
|                 |     | 1,293                   | 100              | 94.78             | 95.24              | 94.77           | 94.74             | 94.78              |
|                 |     | 841                     | 250              | 96.74             | 96.86              | 96.74           | 96.72             | 96.74              |
|                 |     | 580                     | 500              | 97.59             | 97.65              | 97.58           | 97.59             | 97.58              |
|                 | 5   | 1,682                   | 50               | 94.23             | 95.13              | 94.23           | 94.13             | 94.23              |
|                 |     | 1,293                   | 100              | 95.37             | 95.35              | 95.36           | 95.35             | 95.33              |
|                 |     | 841                     | 250              | 97                | 97.14              | 97              | 96.99             | 97                 |
|                 |     | 580                     | 500              | 97.54             | 97.59              | 97.54           | 97.54             | 97.54              |
|                 | 6   | 1,682                   | 50               | 94.33             | 95.11              | 94.32           | 94.2              | 94.32              |
|                 |     | 1,293                   | 100              | 95.39             | 95.76              | 95.39           | 95.35             | 95.39              |
|                 |     | 841                     | 250              | 97.1              | 97.27              | 97.1            | 97.1              | 97.1               |
|                 |     | 580                     | 500              | 97.83             | 97.88              | 97.83           | 97.83             | 97.83              |
| Family          | 4   | 520                     | 50               | 92.35             | 93.57              | 92.34           | 92.15             | 92.33              |
|                 |     | 453                     | 100              | 95.32             | 95.9               | 95.32           | 95.32             | 95.31              |
|                 |     | 369                     | 250              | 96.89             | 97.01              | 96.9            | 96.88             | 96.89              |
|                 |     | 301                     | 500              | 97.37             | 97.42              | 97.37           | 97.37             | 97.37              |
|                 | 5   | 520                     | 50               | 93.73             | 94.65              | 93.74           | 93.62             | 93.72              |
|                 |     | 453                     | 100              | 96.11             | 96.54              | 96.11           | 96.08             | 96.11              |

|        |   |     |     |       |       |       |       |       |
|--------|---|-----|-----|-------|-------|-------|-------|-------|
|        |   | 369 | 250 | 97.25 | 97.37 | 97.25 | 97.24 | 97.24 |
|        |   | 301 | 500 | 97.82 | 97.86 | 97.83 | 97.81 | 97.81 |
|        | 6 | 520 | 50  | 95.23 | 95.88 | 95.23 | 95.11 | 95.22 |
|        |   | 453 | 100 | 96.64 | 96.94 | 96.64 | 96.63 | 96.64 |
|        |   | 369 | 250 | 97.49 | 97.62 | 97.48 | 97.49 | 97.49 |
|        |   | 301 | 500 | 98.21 | 98.24 | 98.2  | 98.2  | 98.2  |
| Order  | 4 | 149 | 100 | 94.43 | 94.96 | 94.43 | 94.41 | 94.39 |
|        |   | 106 | 500 | 98    | 98.05 | 98.01 | 98.01 | 97.98 |
|        | 5 | 149 | 100 | 95.64 | 96.16 | 95.64 | 95.61 | 95.61 |
|        |   | 106 | 500 | 98.33 | 98.39 | 98.34 | 98.34 | 98.32 |
|        | 6 | 149 | 100 | 96.17 | 96.72 | 96.17 | 96.21 | 96.15 |
|        |   | 106 | 500 | 98.19 | 98.25 | 98.19 | 98.19 | 98.17 |
| Class  | 4 | 31  | 100 | 95.48 | 95.85 | 95.48 | 95.46 | 95.35 |
|        |   | 25  | 500 | 98.32 | 98.39 | 98.31 | 98.32 | 98.25 |
|        | 5 | 31  | 100 | 97.42 | 97.64 | 97.42 | 97.39 | 97.34 |
|        |   | 25  | 500 | 98.88 | 98.9  | 98.87 | 98.87 | 98.83 |
|        | 6 | 31  | 100 | 97.09 | 97.38 | 97.1  | 97.08 | 97.01 |
|        |   | 25  | 500 | 98.8  | 98.86 | 98.8  | 98.8  | 98.75 |
| Phylum | 4 | 2   | 500 | 99    | 99.02 | 99    | 98.99 | 98.02 |
|        | 5 | 2   | 500 | 100   | 100   | 100   | 100   | 100   |
|        | 6 | 2   | 500 | 100   | 100   | 100   | 100   | 100   |
